# Supplementary material for: Activin A is increased in the nucleus accumbens following a cocaine binge
Source: PubMed Central journal article supplement (PMC5341561; doi:10.1038/srep43658), 2017-03-08
Supplement: srep43658-s1.pdf [file srep43658-s1.pdf]

**Activin A is increased in the Nucleus Accumbens following a cocaine binge**

***Supplemental Information***

Zi-Jun Wang<sup>a,b</sup>, Jennifer A. Martin<sup>a,b</sup>, Amy M. Gancarz<sup>a,b,c</sup>, Danielle N. Adank<sup>a</sup>, Fraser J.

Sim<sup>a</sup>, David M. Dietz<sup>a,b,\*</sup>

<sup>a</sup>Department of Pharmacology and Toxicology, Research Institute on Addictions, Program in Neuroscience, State University of New York at Buffalo, Buffalo, NY;

<sup>b</sup>Department of Psychology, State University of New York at Buffalo, Buffalo, NY;

<sup>c</sup>Department of Psychology, California State University Bakersfield, Bakersfield, CA

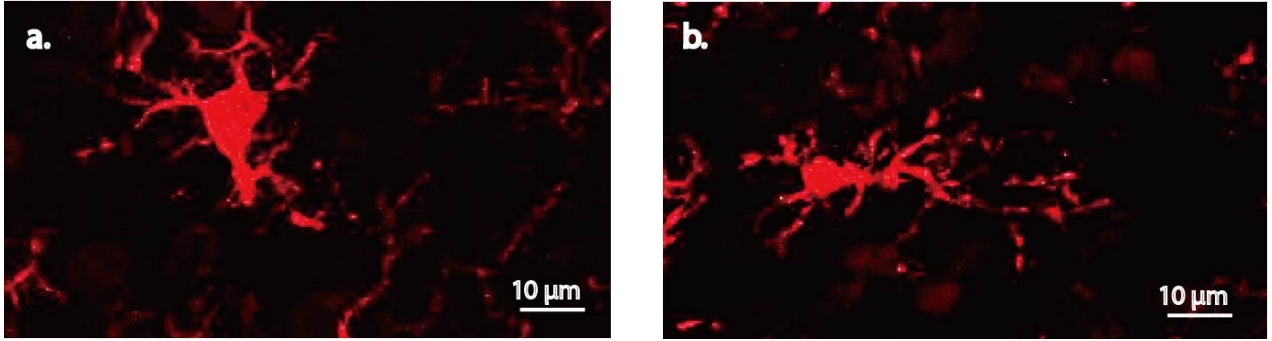

**Figure S1. IBA1-immunohistochemistry revealing microglial cells with amoeboid (a, activated) and ramified (b, non-activated) morphology.**

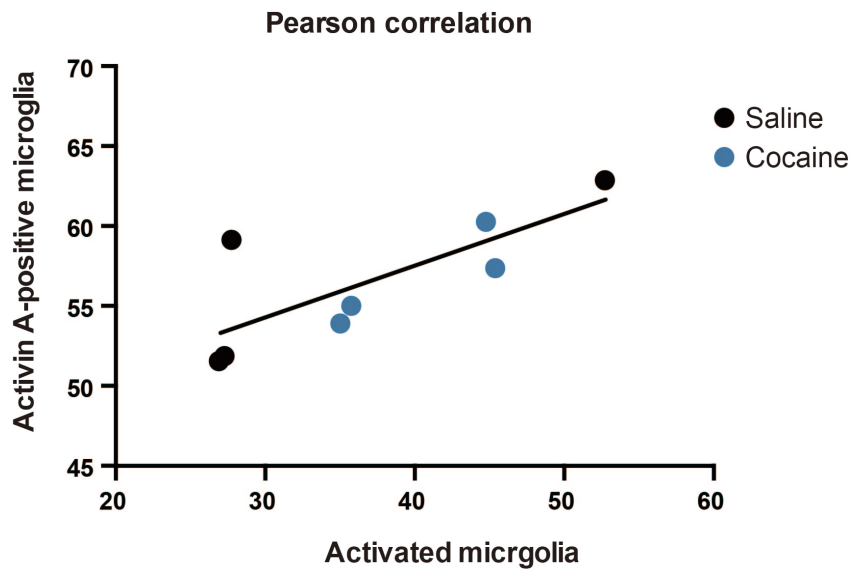

**Figure S2. Correlation between activated microglia and activin A<sup>+</sup> microglia.**

Pearson correlation revealed that there is a significant positive correlation between activated microglia number and activin A<sup>+</sup> microglia number ( $r = 0.767$ ,  $P = 0.026$ ).
